# Supplementary material for: Urinary Protein Profiling for Potential Biomarkers of Chronic Kidney Disease: A Pilot Study
Source: MDPI journal article supplement (doi:10.3390/diagnostics12112583), 2022-10-25
Supplement: s1 [file s1]

Supplementary materials

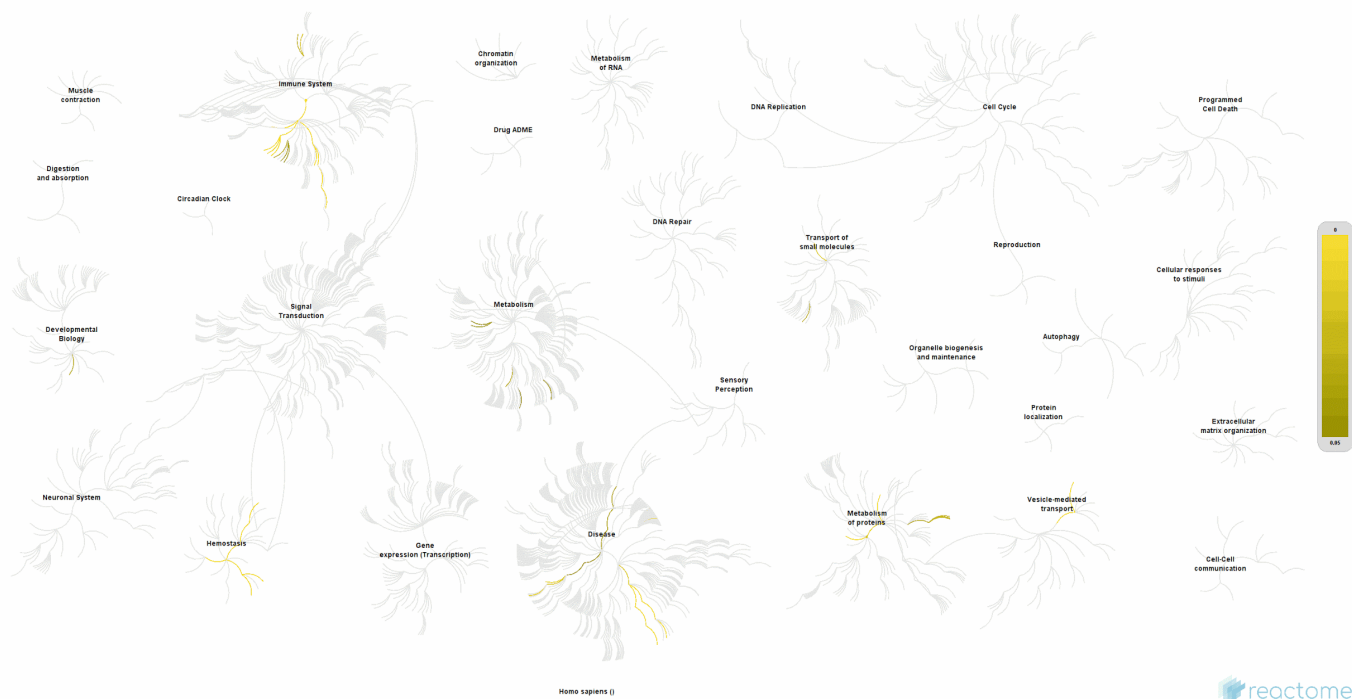

**Scheme S1.** Pathway overview of the 29 most relevant proteins of the CKD group. The color code yellow denotes the enrichment of the respective pathway with a generated significance level ( $p$ -value  $< 0.05$ ). The Reactome Knowledgebase, open-source, open access [17].

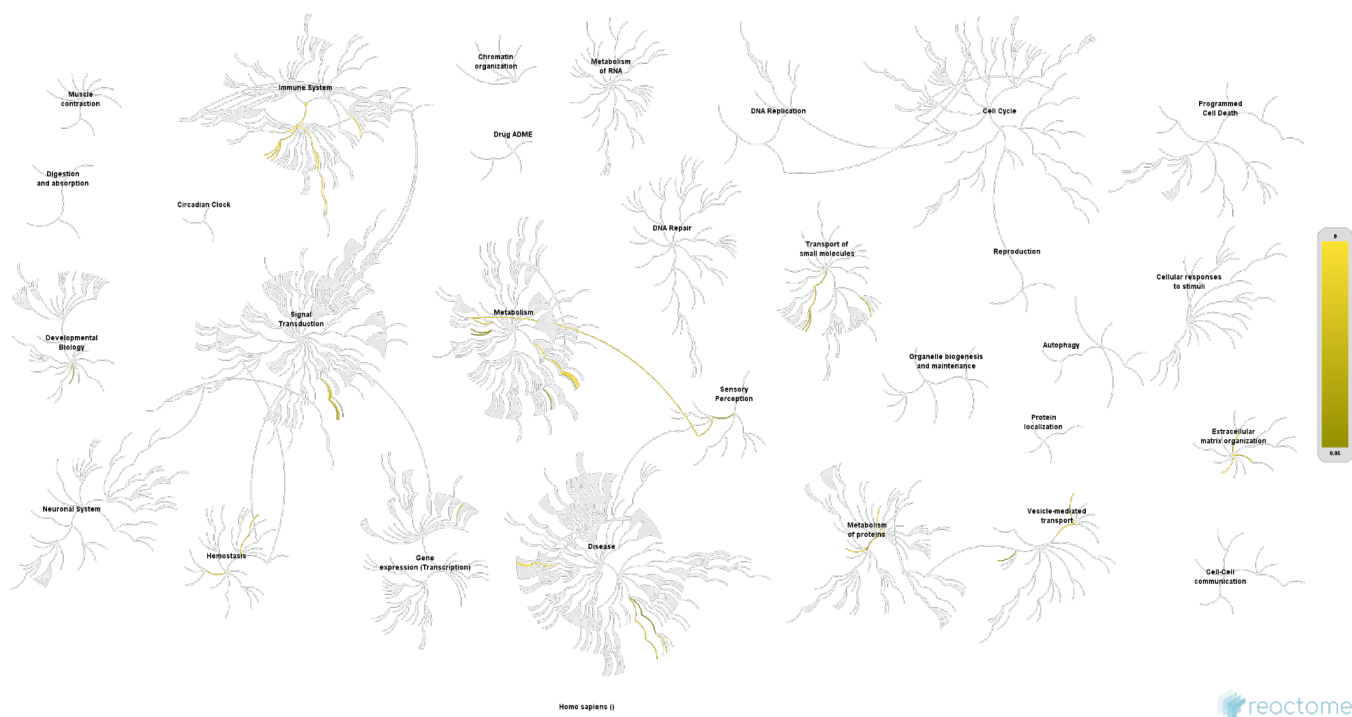

**Scheme S2.** Pathway overview of the 30 most relevant proteins of the healthy group. The color code yellow denotes the enrichment of the respective pathway with a generated significance level ( $p$ -value  $< 0.05$ ). The Reactome Knowledgebase, open-source, open access [17].

**Table S1.** Pathway analysis of the 28 most relevant proteins of the CKD group with indication of significance level and false discovery rate.

| Pathway name                                                                                                                | Identified proteins | Total proteins* | pValue   | False discovery rate |
|-----------------------------------------------------------------------------------------------------------------------------|---------------------|-----------------|----------|----------------------|
| Platelet degranulation                                                                                                      | 9                   | 128             | 2.01E-11 | 1.26E-09             |
| Response to elevated platelet cytosolic Ca <sup>2+</sup>                                                                    | 9                   | 133             | 2.81E-11 | 1.26E-09             |
| Hemostasis                                                                                                                  | 15                  | 726             | 2.99E-11 | 1.26E-09             |
| Scavenging of heme from plasma                                                                                              | 8                   | 99              | 1.04E-10 | 3.22E-09             |
| Platelet activation, signaling and aggregation                                                                              | 10                  | 265             | 5.26E-10 | 1.27E-08             |
| Regulation of Insulin-like Growth Factor (IGF) transport and uptake by Insulin-like Growth Factor Binding Proteins (IGFBPs) | 8                   | 124             | 6.03E-10 | 1.27E-08             |
| Binding and Uptake of Ligands by Scavenger Receptors                                                                        | 8                   | 129             | 8.21E-10 | 1.48E-08             |
| Post-translational protein phosphorylation                                                                                  | 7                   | 107             | 7.47E-09 | 1.12E-07             |
| Innate Immune System                                                                                                        | 14                  | 1191            | 2.52E-07 | 3.53E-06             |
| Neutrophil degranulation                                                                                                    | 9                   | 480             | 1.69E-06 | 2.02E-05             |
| Vesicle-mediated transport                                                                                                  | 10                  | 761             | 9.33E-06 | 1.03E-04             |
| Regulation of Complement cascade                                                                                            | 5                   | 135             | 2.02E-05 | 2.02E-04             |
| Intrinsic Pathway of Fibrin Clot Formation                                                                                  | 3                   | 23              | 2.75E-05 | 2.47E-04             |
| Complement cascade                                                                                                          | 5                   | 146             | 2.93E-05 | 2.64E-04             |
| Classical antibody-mediated complement activation                                                                           | 4                   | 95              | 9.10E-05 | 7.28E-04             |
| FCGR activation                                                                                                             | 4                   | 101             | 1.15E-04 | 8.06E-04             |
| Creation of C4 and C2 activators                                                                                            | 4                   | 103             | 1.24E-04 | 8.68E-04             |
| Formation of Fibrin Clot (Clotting Cascade)                                                                                 | 3                   | 39              | 1.30E-04 | 9.13E-04             |
| Initial triggering of complement                                                                                            | 4                   | 111             | 1.65E-04 | 9.90E-04             |
| Role of phospholipids in phagocytosis                                                                                       | 4                   | 114             | 1.83E-04 | 0.001                |
| FCGR3A-mediated IL10 synthesis                                                                                              | 4                   | 128             | 2.83E-04 | 0.0017               |
| Cell surface interactions at the vascular wall                                                                              | 5                   | 246             | 3.34E-04 | 0.0017               |
| Immune System                                                                                                               | 14                  | 2249            | 4.27E-04 | 0.002                |
| Parasite infection                                                                                                          | 4                   | 149             | 5.02E-04 | 0.002                |
| Leishmania phagocytosis                                                                                                     | 4                   | 149             | 5.02E-04 | 0.002                |
| FCGR3A-mediated phagocytosis                                                                                                | 4                   | 149             | 5.02E-04 | 0.002                |
| Regulation of actin dynamics for phagocytic cup formation                                                                   | 4                   | 150             | 5.15E-04 | 0.0021               |
| Fcgamma receptor (FCGR) dependent phagocytosis                                                                              | 4                   | 175             | 9.13E-04 | 0.0036               |
| Common Pathway of Fibrin Clot Formation                                                                                     | 2                   | 22              | 0.0014   | 0.0057               |
| Anti-inflammatory response favouring Leishmania parasite infection                                                          | 4                   | 259             | 0.0038   | 0.015                |
| Leishmania parasite growth and survival                                                                                     | 4                   | 259             | 0.0038   | 0.015                |

|                                                                                                          |    |      |        |       |
|----------------------------------------------------------------------------------------------------------|----|------|--------|-------|
| Defective SLC40A1 causes hemochromatosis 4 (HFE4) (macrophages)                                          | 1  | 2    | 0.005  | 0.015 |
| Defective CP causes aceruloplasminemia (ACERULOP)                                                        | 1  | 2    | 0.005  | 0.015 |
| Post-translational protein modification                                                                  | 9  | 1423 | 0.0063 | 0.019 |
| Defective F8 cleavage by thrombin                                                                        | 1  | 3    | 0.0075 | 0.022 |
| Defective factor XII causes hereditary angioedema                                                        | 1  | 3    | 0.0075 | 0.022 |
| Iron uptake and transport                                                                                | 2  | 58   | 0.0093 | 0.028 |
| Leishmania infection                                                                                     | 4  | 345  | 0.01   | 0.031 |
| CD22 mediated BCR regulation                                                                             | 2  | 70   | 0.013  | 0.04  |
| Metabolism of proteins                                                                                   | 10 | 1946 | 0.016  | 0.047 |
| Defective factor VIII causes hemophilia A                                                                | 1  | 7    | 0.017  | 0.047 |
| Transport of gamma-carboxylated protein precursors from the endoplasmic reticulum to the Golgi apparatus | 1  | 9    | 0.022  | 0.047 |
| Antigen activates B Cell Receptor (BCR) leading to generation of second messengers                       | 2  | 95   | 0.024  | 0.047 |
| Removal of aminoterminal propeptides from gamma-carboxylated proteins                                    | 1  | 10   | 0.025  | 0.049 |
| Gamma-carboxylation of protein precursors                                                                | 1  | 10   | 0.025  | 0.049 |

\* Number of total proteins in the Reactome Knowledgebase.

**Table S2.** Pathway analysis of the 30 most relevant proteins of the healthy group with indication of significance level and false discovery rate.

| Pathway name                                                                                                                | Identified proteins | Total proteins* | pValue   | False discovery rate |
|-----------------------------------------------------------------------------------------------------------------------------|---------------------|-----------------|----------|----------------------|
| Regulation of Insulin-like Growth Factor (IGF) transport and uptake by Insulin-like Growth Factor Binding Proteins (IGFBPs) | 7                   | 124             | 1.25E-07 | 2.11E-05             |
| Post-translational protein phosphorylation                                                                                  | 6                   | 107             | 1.13E-06 | 9.46E-05             |
| Regulation of Complement cascade                                                                                            | 5                   | 135             | 6.85E-05 | 0.0038               |
| Complement cascade                                                                                                          | 5                   | 146             | 9.88E-05 | 0.0041               |
| Integrin cell surface interactions                                                                                          | 4                   | 85              | 1.58E-04 | 0.0052               |
| Scavenging of heme from plasma                                                                                              | 4                   | 99              | 2.81E-04 | 0.0079               |
| Neutrophil degranulation                                                                                                    | 7                   | 480             | 7.19E-04 | 0.015                |
| Binding and Uptake of Ligands by Scavenger Receptors                                                                        | 4                   | 129             | 7.56E-04 | 0.015                |
| Defective EXT1 causes exostoses 1, TRPS2 and CHDS                                                                           | 2                   | 14              | 9.45E-04 | 0.015                |
| Defective EXT2 causes exostoses 2                                                                                           | 2                   | 14              | 9.45E-04 | 0.015                |
| Degradation of the extracellular matrix                                                                                     | 4                   | 140             | 0.001    | 0.015                |
| Defective B3GALT6 causes EDSP2 and SEMDJL1                                                                                  | 2                   | 20              | 0.002    | 0.023                |
| Defective B4GALT7 causes EDS, progeroid type                                                                                | 2                   | 20              | 0.002    | 0.023                |
| Defective B3GAT3 causes JDSSDHD                                                                                             | 2                   | 20              | 0.002    | 0.023                |
| HS-GAG degradation                                                                                                          | 2                   | 22              | 0.0023   | 0.024                |

|                                                                 |    |      |        |       |
|-----------------------------------------------------------------|----|------|--------|-------|
| Extracellular matrix organization                               | 5  | 301  | 0.0026 | 0.024 |
| Other interleukin signaling                                     | 2  | 24   | 0.0027 | 0.024 |
| A tetrasaccharide linker sequence is required for GAG synthesis | 2  | 26   | 0.0032 | 0.025 |
| Innate Immune System                                            | 10 | 1191 | 0.0033 | 0.027 |
| Classical antibody-mediated complement activation               | 3  | 95   | 0.0035 | 0.028 |
| FCGR activation                                                 | 3  | 101  | 0.0041 | 0.029 |
| Creation of C4 and C2 activators                                | 3  | 103  | 0.0043 | 0.03  |
| HS-GAG biosynthesis                                             | 2  | 31   | 0.0045 | 0.031 |
| Initial triggering of complement                                | 3  | 111  | 0.0053 | 0.032 |
| Plasma lipoprotein remodeling                                   | 2  | 35   | 0.0057 | 0.032 |
| Role of phospholipids in phagocytosis                           | 3  | 114  | 0.0058 | 0.032 |
| Immune System                                                   | 14 | 2249 | 0.0071 | 0.032 |
| Glycosaminoglycan metabolism                                    | 3  | 124  | 0.0072 | 0.032 |
| Hemostasis                                                      | 7  | 726  | 0.0074 | 0.032 |
| Cell surface interactions at the vascular wall                  | 4  | 246  | 0.0077 | 0.032 |
| Diseases associated with glycosaminoglycan metabolism           | 2  | 41   | 0.0077 | 0.032 |
| FCGR3A-mediated IL10 synthesis                                  | 3  | 128  | 0.0079 | 0.032 |
| Platelet degranulation                                          | 3  | 128  | 0.0079 | 0.032 |
| Response to elevated platelet cytosolic Ca <sup>2+</sup>        | 3  | 133  | 0.0088 | 0.035 |
| Retinoid metabolism and transport                               | 2  | 44   | 0.0088 | 0.035 |
| NFG and proNGF binds to p75NTR                                  | 1  | 3    | 0.0095 | 0.036 |
| Ceramide signalling                                             | 1  | 3    | 0.0095 | 0.036 |
| Metabolism of fat-soluble vitamins                              | 2  | 48   | 0.01   | 0.036 |
| Chondroitin sulfate/dermatan sulfate metabolism                 | 2  | 50   | 0.011  | 0.036 |
| Parasite infection                                              | 3  | 149  | 0.012  | 0.036 |
| Leishmania phagocytosis                                         | 3  | 149  | 0.012  | 0.036 |
| FCGR3A-mediated phagocytosis                                    | 3  | 149  | 0.012  | 0.036 |
| Regulation of actin dynamics for phagocytic cup formation       | 3  | 150  | 0.012  | 0.036 |
| Axonal growth stimulation                                       | 1  | 4    | 0.013  | 0.038 |
| Heparan sulfate/heparin (HS-GAG) metabolism                     | 2  | 55   | 0.013  | 0.04  |
| Non-integrin membrane-ECM interactions                          | 2  | 59   | 0.015  | 0.046 |

\* Number of total proteins in the Reactome Knowledgebase.
